# Supplementary material for: Simvastatin Reduces Protection and Intestinal T Cell Responses Induced by a Norovirus P Particle Vaccine in Gnotobiotic Pigs
Source: MDPI journal article supplement (doi:10.3390/pathogens10070829), 2021-07-01

Supplementary Figure S1. Gating and staining strategy for CD3+CD4+BrdU+ and CD3+CD8+ BrdU+ T cells

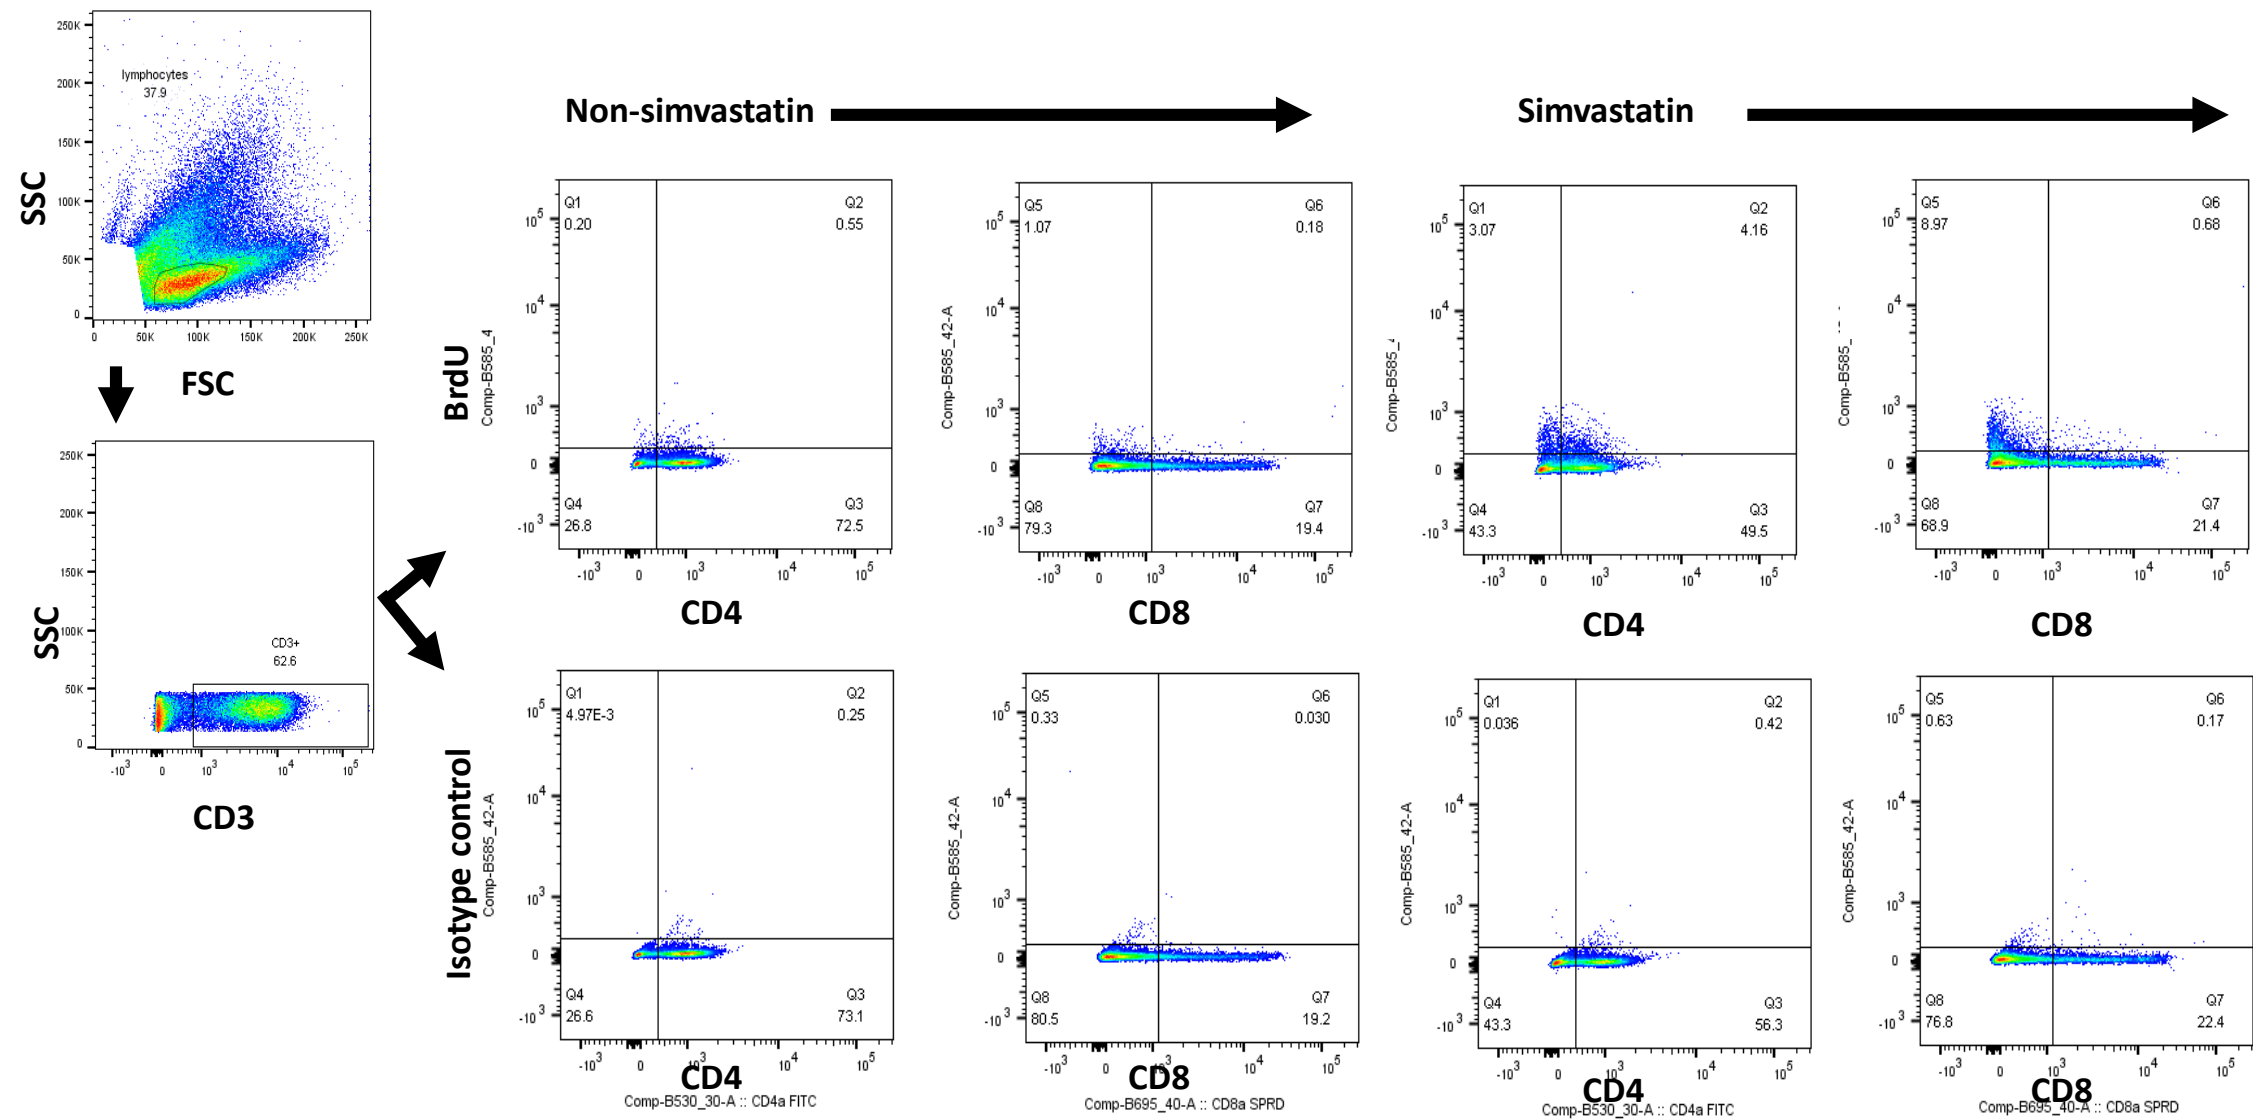

**Supplementary Figure S2. Gating strategy and representing dot plots of Th and CTL in different tissues.**

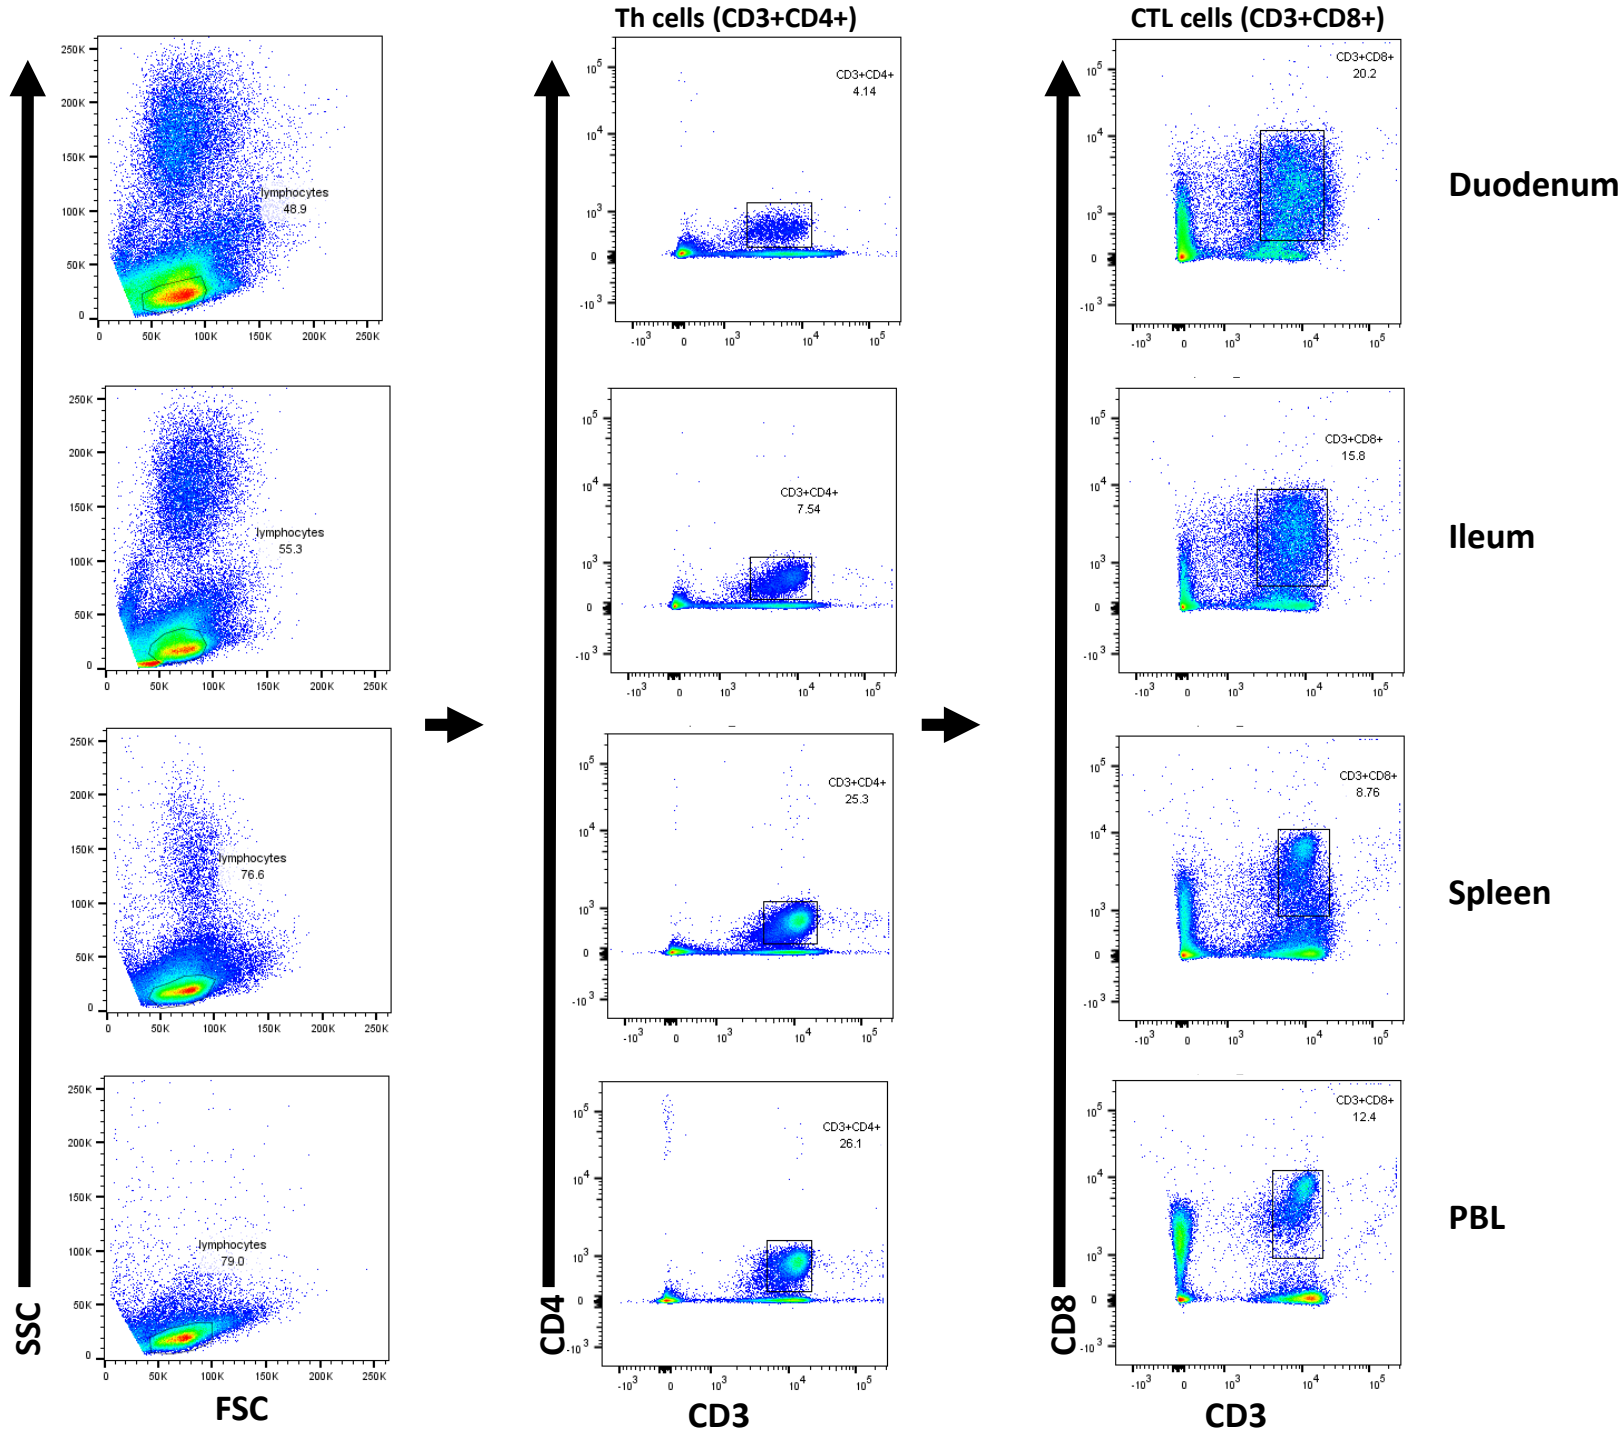

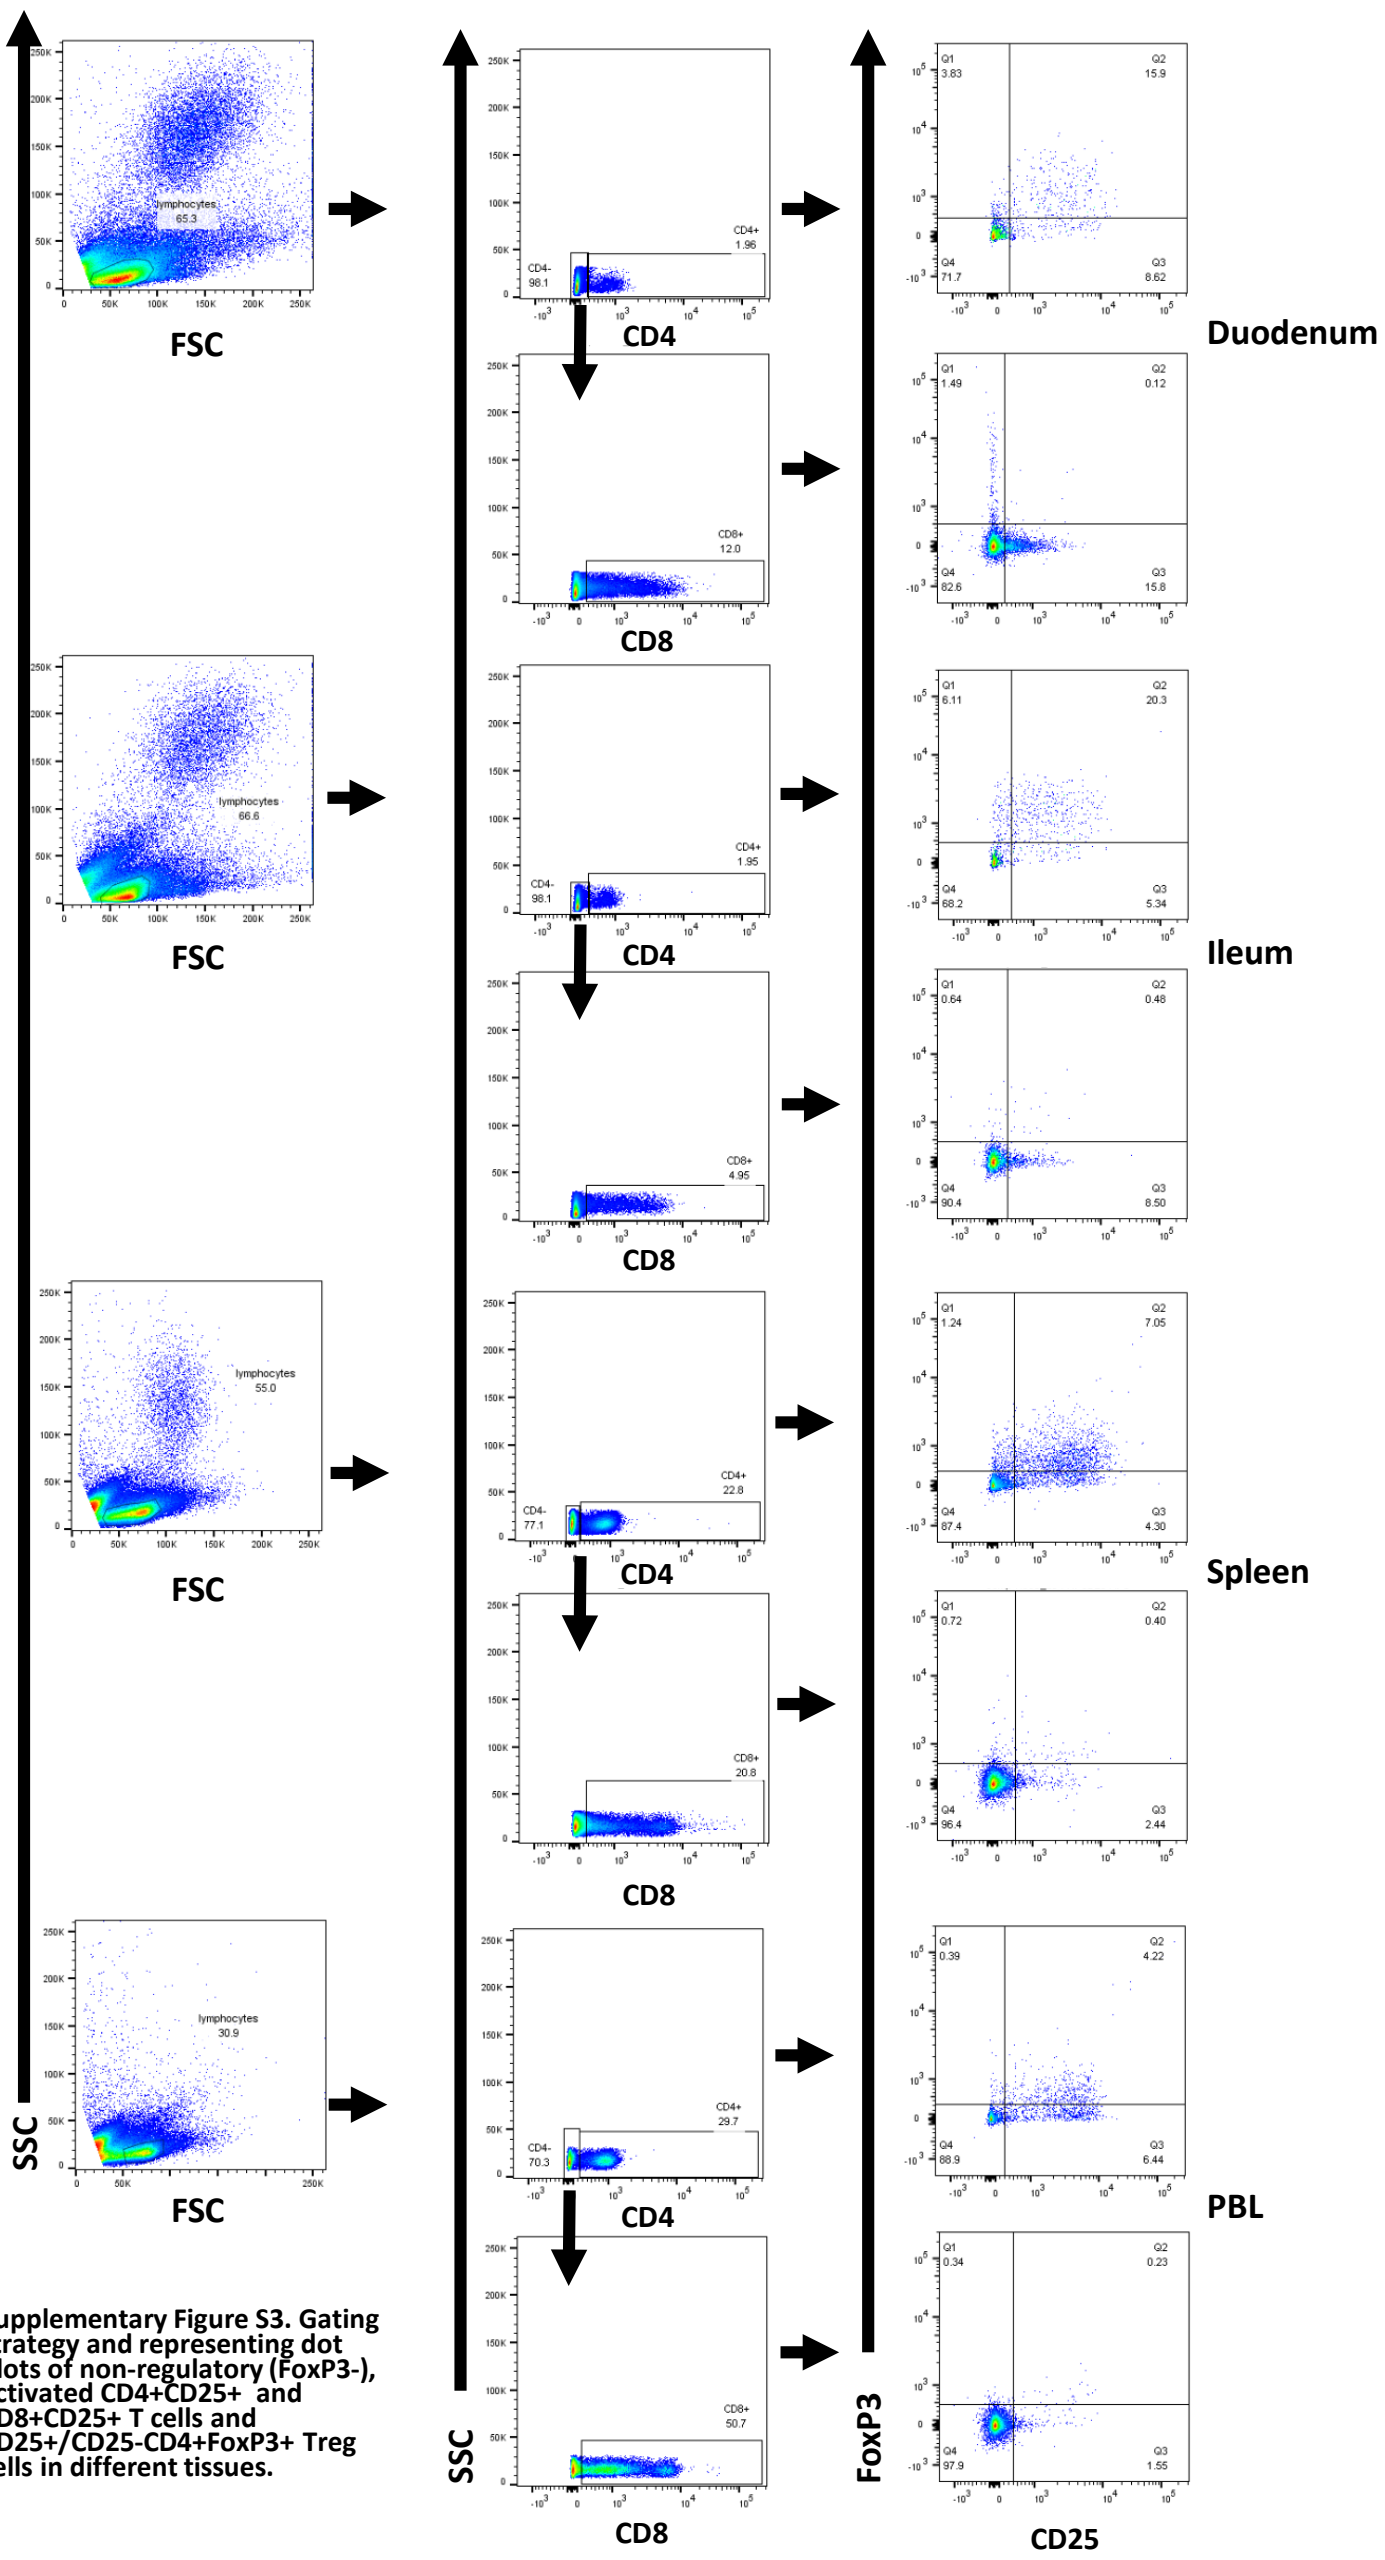

**Supplementary Figure S4**  
**Gating strategy and**  
**representing dot plots of IFN-**  
 **$\gamma$ + cells among CD3+CD4+**  
**and CD3+CD8+ cells in**  
**different tissues.**

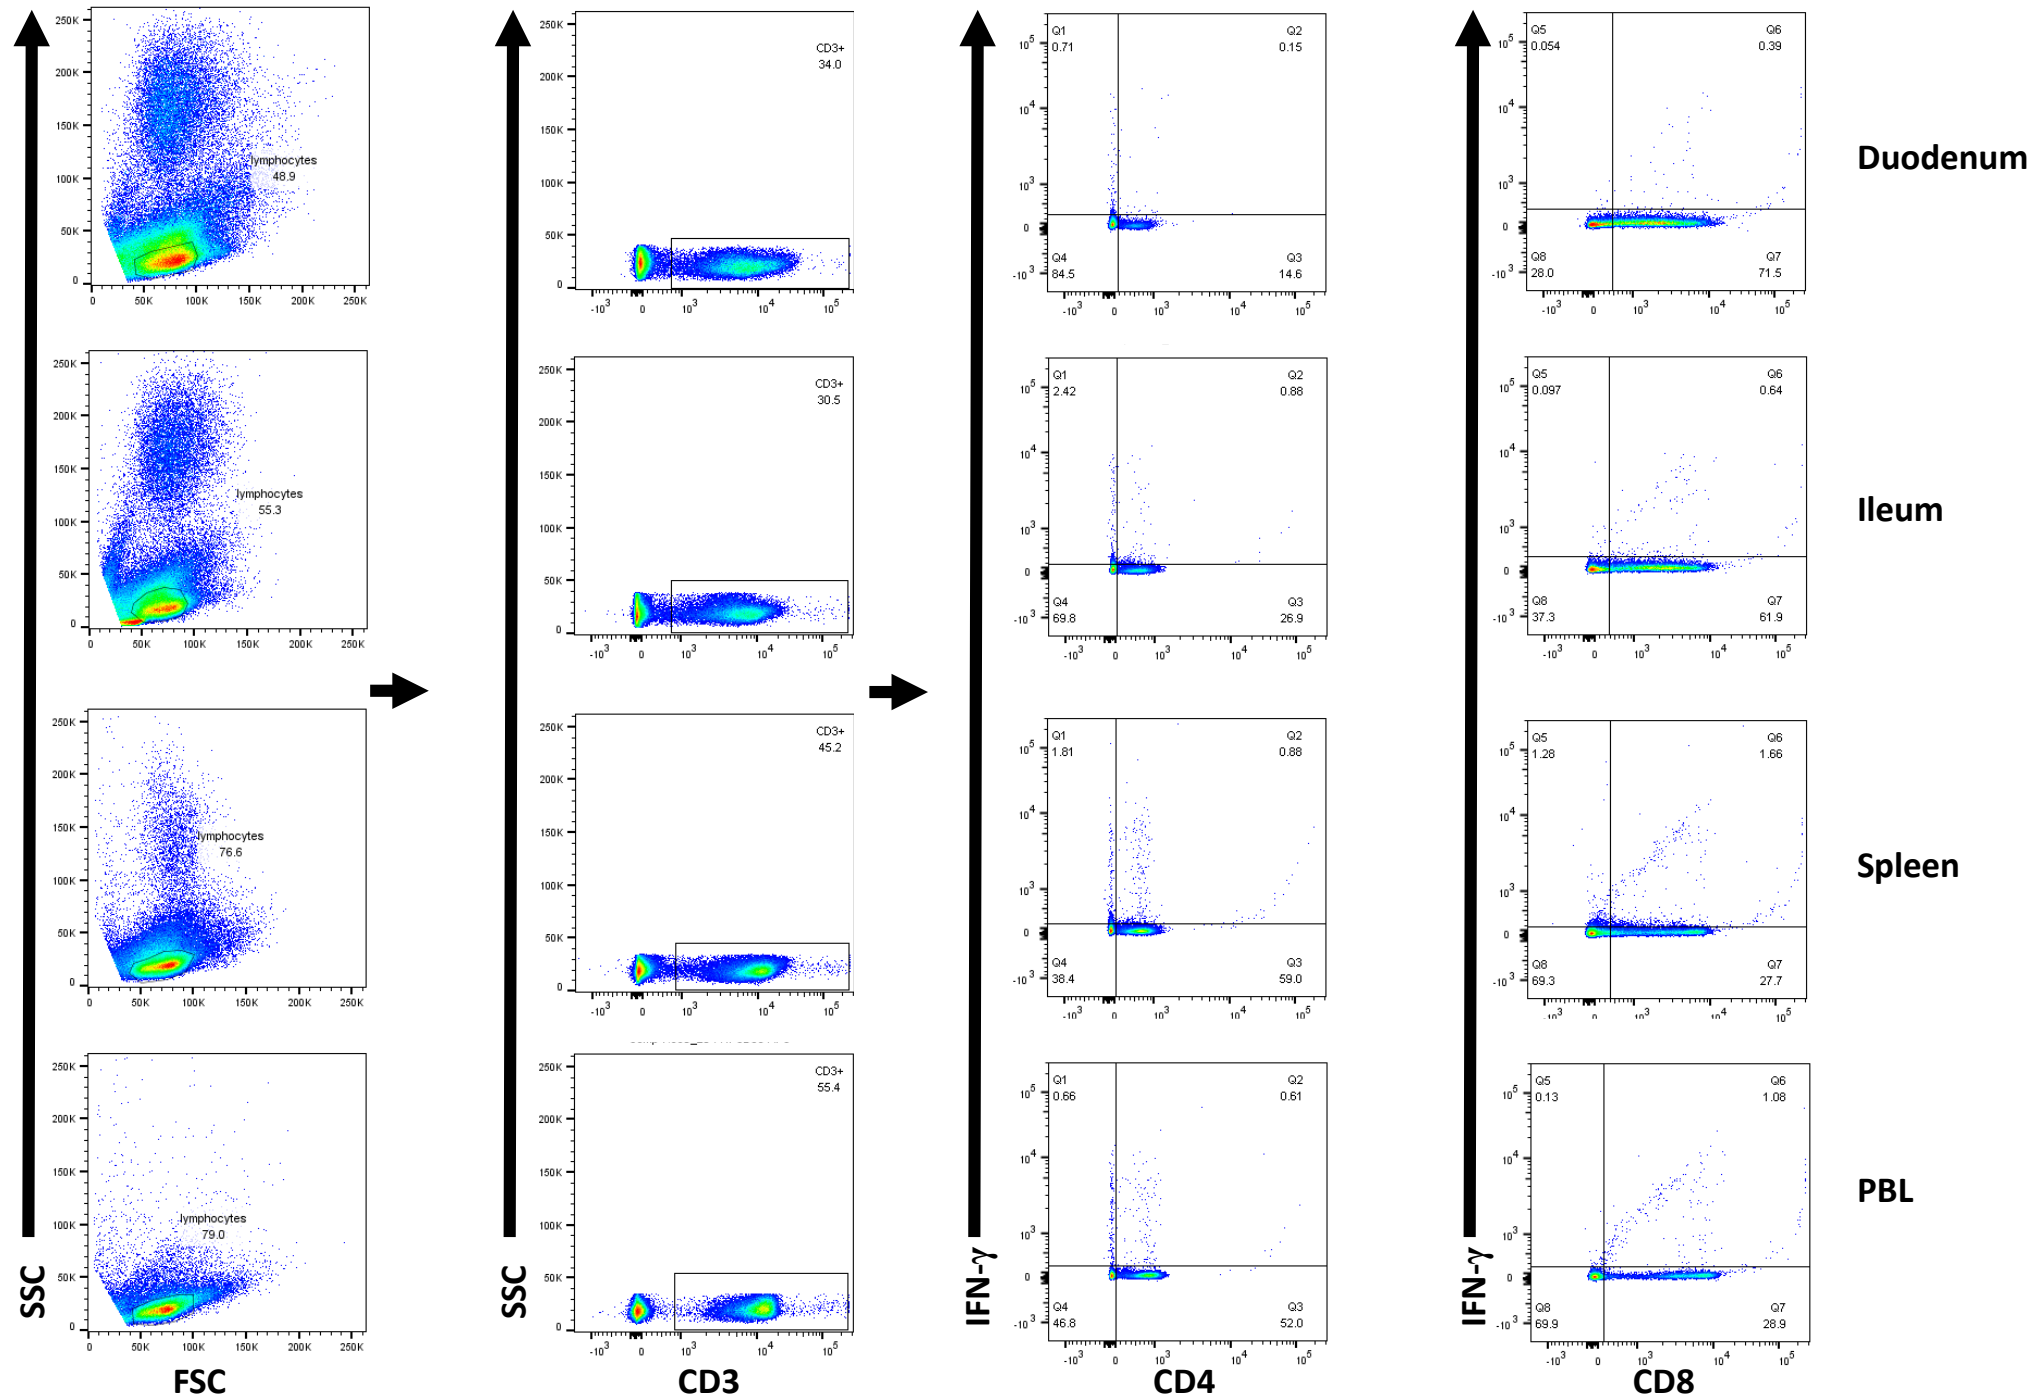

Supplement: s1 [file s1]
